# Supplementary material
Source: MDPI journal article supplement (https://www.mdpi.com/2071-1050/11/14/3909)
Supplement: s1 [file s1]

**Assessment of Municipal Solid Waste Generation in Universiti Putra Malaysia and Its Potential for  
Green Energy Production**

Ahmad Aiman Zulkifli<sup>1</sup>, Mohd Zulkhairi Mohd Yusoff<sup>1,2\*</sup>, Latifah Abd Manaf<sup>3</sup>, Mohd Rafein Zakaria<sup>1,2</sup>, Ahmad Muhaimin Roslan<sup>1,2</sup>, Hidayah Ariffin<sup>1,2</sup>, Yoshihito Shirai<sup>4</sup>, Mohd Ali Hassan<sup>1</sup>

<sup>1</sup>Department of Bioprocess Technology, Faculty of Biotechnology and Biomolecular Sciences, Universiti Putra Malaysia, 43400 Serdang, Selangor, Malaysia

<sup>2</sup>Laboratory of Biopolymer and Derivatives, Institute of Tropical Forestry and Forest Products (INTROP), Universiti Putra Malaysia, 43400 UPM Serdang, Selangor, Malaysia

<sup>3</sup>Department of Environmental Sciences, Faculty of Environmental Studies, Universiti Putra Malaysia, 43400 UPM Serdang, Selangor, Malaysia

<sup>4</sup>Graduate School of Life Sciences and System Engineering, Kyushu Institute of Technology, 808-0196 Hibikino 2-4, Wakamatsu-ku, Kitakyushu-shi, Fukuoka, Japan

\*Corresponding author:

Name: Mohd Zulkhairi Mohd Yusoff (PhD)

E-mail: mzulkhairi@upm.edu.my

Address: Department of Bioprocess Technology, Faculty of Biotechnology and Biomolecular Sciences,  
Universiti Putra Malaysia, 43400 Serdang, Selangor, Malaysia

Phone: +6-03-9769-8060

Fax: +6-03-9769-7590

ORCID: 0000-0002-6787-9350

Table S1: Selected Administrative Office, restaurant premises and residential area for the survey of MSW generated in UPM

| Group      | Name of the premise                                                 |
|------------|---------------------------------------------------------------------|
| Offices    | UPM Sport Centre                                                    |
|            | Malaysian Research Institute on Ageing ( <i>MyAgeing</i> )          |
|            | Office of Deputy Vice Chancellor (Industry And Community Relations) |
|            | Halal Products Research Institute                                   |
|            | University Agriculture Park                                         |
|            | Faculty of Veterinary Medicine                                      |
|            | Faculty of Agriculture                                              |
|            | Faculty of Medicine and Health Sciences                             |
|            | Office of the Deputy Vice Chancellor (Research & Innovation)        |
|            | Centre of Foundation Studies for Agricultural Science               |
|            | Faculty of Biotechnology and Biomolecular Sciences                  |
|            | Faculty of Engineering                                              |
|            | Faculty of Modern Languages And Communication                       |
|            | Biosciences Institutes (LIVES)                                      |
|            | Institute of Tropical Forestry And Forest Products                  |
|            | Sultan Abdul Samad Library                                          |
|            | Registrar Office                                                    |
|            | UPM Press                                                           |
|            | University Health Centre                                            |
|            | Pusat Islam UPM                                                     |
|            | School of Graduate Studies                                          |
|            | Wazan UPM                                                           |
| Restaurant | Serumpun A1                                                         |
|            | Serumpun A2                                                         |
|            | Serumpun A4                                                         |
|            | Serumpun A5                                                         |
|            | Putra P4                                                            |
|            | Putra P5                                                            |
|            | Putra P7                                                            |

## Supplementary materials

Putra P9

Al Jannah Café

Kolej Canselor Café

Sejora Cafe

---

|              |                                 |
|--------------|---------------------------------|
| Residentials | Colleges in UPM (college 1- 17) |
|              | Quarters in UPM                 |

---

## Supplementary materials

Table S2: Sample question used during the survey activities of MSW generation index and its composition in UPM.

|     | Major group            | Link to access                                            |
|-----|------------------------|-----------------------------------------------------------|
| (1) | Residential house      | <a href="http://tiny.cc/uzm37y">http://tiny.cc/uzm37y</a> |
|     | Colleges               | <a href="http://tiny.cc/x6m37y">http://tiny.cc/x6m37y</a> |
| (2) | Administrative offices | <a href="http://tiny.cc/vbn37y">http://tiny.cc/vbn37y</a> |
| (3) | Restaurant premises.   | <a href="http://tiny.cc/91m37y">http://tiny.cc/91m37y</a> |

$$\begin{aligned} \text{Max. conversion} &= 2200 \text{ kg COD} \times 0.35 \text{ m}^3 = 770 \text{ m}^3 \text{ CH}_4 \\ 0.72 \text{ kg/m}^3 &= \text{mass CH}_4 / 770 \text{ m}^3, \text{ mass CH}_4 = 554.4 \text{ kg CH}_4 \\ \text{Electricity conversion} &= 554.4 \text{ kg CH}_4 \times 1.29 \text{ kWh/kg} \\ &= 715.2 \text{ kWh} \end{aligned}$$

**Figure S1:** Calculation of potential electricity generation from methane produce from the anaerobic digestion of organic waste in UPM [1].

1. Khanal, S. K., Anaerobic biotechnology for bioenergy production : principles and applications. In Wiley-Blackwell: Ames, Iowa ;, 2008.
